# Supplementary material for: Water quality changes and organic matter removal using natural bank infiltration at a boreal lake in Finland
Source: Springer Nature journal article supplement (doi:10.1007/s10040-020-02127-9), 2020-02-18
Supplement: MOESM1 [file 17721552]

## Water quality changes and organic matter removal using natural bank infiltration at a boreal lake in Finland

M. Jylhä-Ollila, H. Laine-Kaulio, P. Niinikoski-Fusswinkel, J. Leveinen, H. Koivusalo

[majja.jylha-ollila@aalto.fi](mailto:majja.jylha-ollila@aalto.fi), Aalto University School of Engineering, Department of Built Environment

Table S1. Average lake water isotopic composition and water quality, standard deviation and coefficient of variability.

| Parameter                                | Average value<br>and standard deviation | Coefficient<br>of variability | Number<br>of samples<br><i>N</i> |
|------------------------------------------|-----------------------------------------|-------------------------------|----------------------------------|
| $\delta^{18}\text{O}$ (‰)                | $-6.42 \pm 0.08$                        | 0.01                          | 9                                |
| $\delta^2\text{H}$ (‰)                   | $-57.49 \pm 0.86$                       | 0.01                          | 9                                |
| TOC (mg/L)                               | $3.0 \pm 0.2$                           | 0.08                          | 15                               |
| DOC (mg/L)                               | $2.6 \pm 0.2$                           | 0.07                          | 11                               |
| COD <sub>Mn</sub> (mg O <sub>2</sub> /L) | $2.5 \pm 0.4$                           | 0.15                          | 12                               |
| Fe (µg/L)                                | $13 \pm 4.6$                            | 0.34                          | 11                               |
| Mn (µg/L)                                | $7 \pm 0.8$                             | 0.12                          | 12                               |
| DO (mg/L)                                | $11 \pm 1.5$                            | 0.14                          | 13                               |
| pH                                       | $5.9 \pm 0.5$                           | 0.08                          | 13                               |
| EC (mS/m)                                | $1.8 \pm 0.1$                           | 0.05                          | 11                               |
| Turbidity (NTU)                          | $0.6 \pm 0.03$                          | 0.05                          | 2                                |
| Ca <sup>2+</sup> (µg/L)                  | $980 \pm 80$                            | 0.08                          | 5                                |
| Na <sup>+</sup> (µg/L)                   | $1120 \pm 75$                           | 0.07                          | 6                                |
| Mg <sup>2+</sup> (µg/L)                  | $360 \pm 20$                            | 0.06                          | 5                                |
| K <sup>+</sup> (µg/L)                    | $450 \pm 20$                            | 0.05                          | 6                                |
| SO <sub>4</sub> <sup>2-</sup> (mg/L)     | $3.9 \pm 0.3$                           | 0.09                          | 8                                |
| HCO <sub>3</sub> <sup>-</sup> (mg/L)     | $0.9 \pm 0.4$                           | 0.41                          | 5                                |
| Cl <sup>-</sup> (mg/L)                   | $1.2 \pm 0.1$                           | 0.06                          | 6                                |
| NO <sub>3</sub> <sup>-</sup> (mg/L)      | < 1.0                                   |                               | 1                                |
| NO <sub>2</sub> <sup>-</sup> (mg/L)      | < 0.0070                                |                               | 1                                |
| NH <sub>4</sub> <sup>+</sup> (mg/L)      | < 0.0060                                |                               | 1                                |

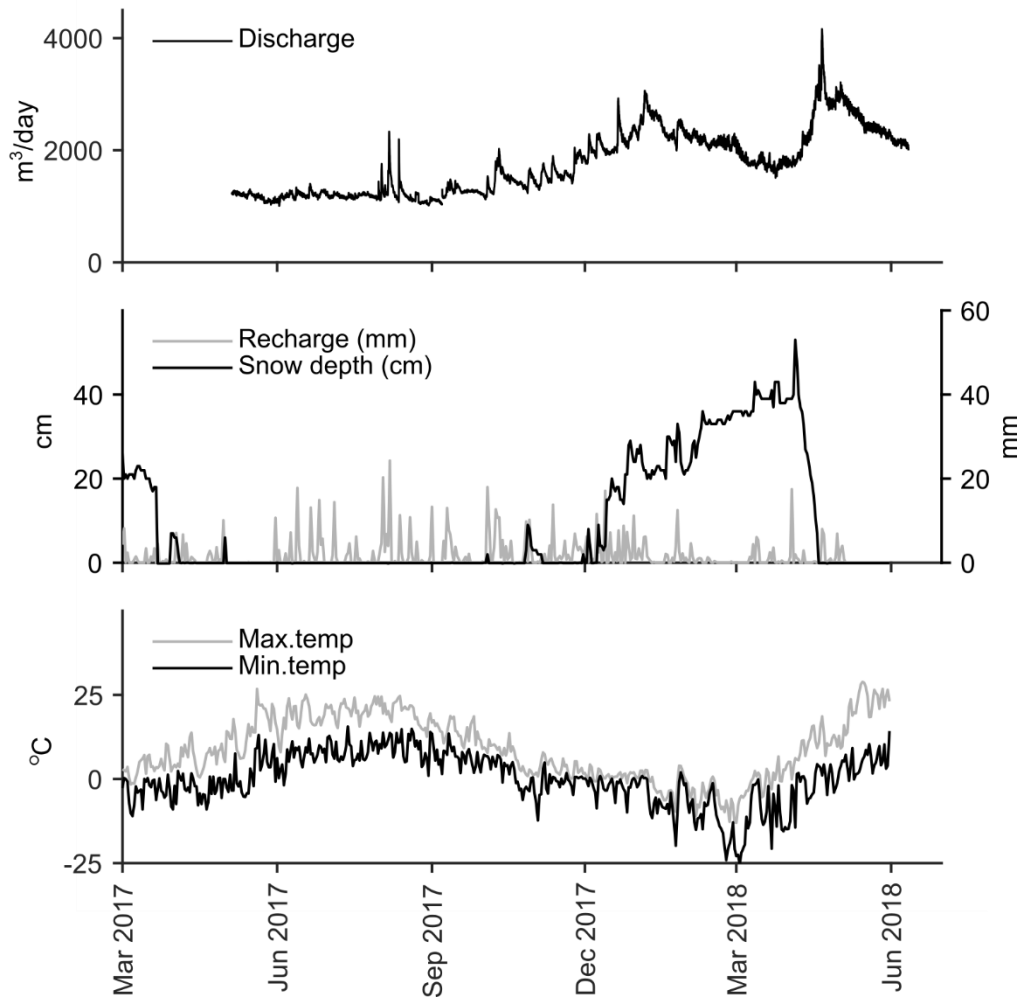

Fig. S1. Discharge at the aquifer outlet. The baseflow level of 1000-1500 m<sup>3</sup>/day represents the groundwater discharge from the studied aquifer. Meteorological data from the closest weather station Laune (Finnish Meteorological Institute 2018) are given as background data to explain the peaks from rain events and snowmelt. The graph contains data from the Finnish Meteorological Institute open data. CC 4.0 Nimeä licence 6/2018.

## ESM Reference

Finnish Meteorological Institute 2018. Data from weather stations <https://ilmatieteenlaitos.fi/havaintojen-lataus#!/> Cited 13.6.2018
